# Supplementary material for: Catalogue of super-trees in Istria (Croatia) created as a result of the citizen science action
Source: Frontiers journal article supplement (doi:10.3389/fenvs.2023.1154101), 2023-05-10
Supplement: Table_1.docx [file Table_1.docx]

Supplementary Material

Catalogue of Super-trees in Istria (Croatia) created as a result of the citizen science action

Sladonja Barbara, Damijanić Danijela*, Uzelac Mirela, Poljuha Danijela

Institute of Agriculture and Tourism, Poreč, Croatia

*** Correspondence:**Damijanić Danijela
danijelad@iptpo.hr

Supplementary Table 1. Data about super-trees in Istria collected using a mobile application.

| **Data** | **Data description** |
| --- | --- |
| Tree ID | A unique symbol of the tree |
| Location | GPS coordinates of tree location |
| Location name | Name of the tree location |
| Position | Information about the tree position |
| Tree species | Plant identity |
| Girth | Tree girth measured at a height of 1 m |
| Average height | Average tree height estimated from the ground |
| Average canopy width | Average tree canopy measured from the ground |
| Health condition | Estimated health condition of the tree |
| Average age | Estimated age of the tree by the word of mouth of local people |
| Interesting facts | Story and interesting facts about the tree |
| Photos | Uploaded photos of the tree |
