# Supplementary material for: Catalogue of super-trees in Istria (Croatia) created as a result of the citizen science action
Source: Frontiers journal article supplement (doi:10.3389/fenvs.2023.1154101), 2023-05-10
Supplement: Table_2.docx [file Table_2.docx]

Supplementary Material

Catalogue of Super-trees in Istria (Croatia) created as a result of the citizen science action

Sladonja Barbara, Damijanić Danijela*, Uzelac Mirela, Poljuha Danijela

Institute of Agriculture and Tourism, Poreč, Croatia

*** Correspondence:**Damijanić Danijela
danijelad@iptpo.hr

Supplementary Table 2. Recorded super-trees and their specifications

| **Species/** | **Girth (at a height of 1 m)** | **Health condition (1-great, 2-good, 3-bad)** | **Average height (m)** | **Average canopy width (m)** | **Longitude** | **Latitude** |
| --- | --- | --- | --- | --- | --- | --- |
| *Castanea sativa* | 10,3 | 2 | 9 | 13x15 | 13.8901878 | 45.2162826 |
| *Tillia platyphyllos* | 7,1 | 2 | 10 | 14x15 | 14.0015838 | 45.4389682 |
| *Quercus pubescens* | 6 | 1 | 25 | 30x36 | 14.0415534 | 45.2426009 |
| *Quercus pubescens* | 6 | 1 | 30 | 23x25 | 14.1290019 | 45.1070903 |
| *Platanus orientalis* | 5,8 | 1 | 25 | 20x20 | 13.6071994 | 45.4653187 |
| *Tillia sp.* | 5,3 | 1 | 15 | 10x13 | 14.0519347 | 45.4844985 |
| *Quercus pubescens* | 5,1 | 2 | 18 | 22x22 | 13.7617778 | 45.4348889 |
| *Platanus orientalis* | 5,05 | 1 | 25 | 18x27 | 14.0134017 | 45.2766411 |
| *Quercus pubescens* | 5 | 1 | 14 | 29x27 | 13.9600056 | 45.0897317 |
| *Quercus pubescens* | 5 | 1 | 13 | 21 | 13.8005878 | 45.2214339 |
| *Quercus cerris* | 4,9 | 2 | 24 | 25x26 | 13.9817537 | 45.1982243 |
| *Quercus pubescens* | 4,9 | 1 | 20 | 26x28 | 13.747565 | 45.284915 |
| *Quercus petraea* | 4,8 | 1 | 16 | 25x17 | 13,5320022 | 45,4843909 |
| *Pinus halepensis* | 4,8 | 1 | 18 | 20x18 | 13,6611948 | 45,2445853 |
| *Tillia sp.* | 4,8 | 1 | 30 | 32x21 | 14.0558286 | 45.4850218 |
| *Tillia sp.* | 4,72 | 1 | 24 | 20x21 | 14.0517923 | 45.4845603 |
| *Quercus pubescens* | 4,6 | 1 | 25 | 25x30 | 13.7158878 | 45.1064881 |
| *Quercus ilex* | 4,5 | 1 | 25 | 16 | 13.7675125 | 44.9994922 |
| *Celtis australis* | 4,4 | 2 | 9 | 12x15 | 13.6219645 | 45.1936179 |
| *Populus nigra* | 4,4 | 1 | 18 | 20x20 | 13.6065788 | 45.4670994 |
| *Acer monspessulanu-m* | 4,4 | 1 | 10 | 17x16 | 13.99083 | 44.9920037 |
| *Tillia sp.* | 4,25 | 1 | 18 | 20x20 | 14.0393645 | 45.4707561 |
| *Celtis australis* | 4,2 | 1 | 13 | 19,5 | 13.8768228 | 45.1606539 |
| *Celtis australis* | 4,1 | 3 | 12 | 9x9 | 13.5929096 | 45.2644137 |
| *Quercus pubescens* | 4,1 | 1 | 15 | 28x25 | 13.5928998 | 45.2702153 |
| *Fraxinus excelsior* | 4,1 | 1 | 15 | 19x15 | 13.8265381 | 45.3548842 |
| *Celtis australis* | 4,1 | 1 | 15 | 13x13 | 13.6456464 | 45.2392838 |
| *Pinus pinea* | 4 | 1 | 16 | 8 | 13.8228311 | 45.3005198 |
| *Pinus pinea* | 4 | 1 | 15 | 16x12 | 13.8224935 | 45.3005909 |
| *Celtis australis* | 4 | 1 | 13 | 20x20 | 13.8391544 | 45.122849 |
| *Quercus pubescens* | 4 | 1 | 30 | 27x22 | 14.1348301 | 45.3353032 |
| *Olea europaea* | 3,9 | 2 | 6 | 22x8 | 13.767952 | 44.914629 |
| *Quercus ilex* | 3,9 | 1 | 13 | 16x13 | 13.593505 | 45.2632999 |
| *Tillia sp.* | 3,9 | 1 | 28 | 21x12 | 14.0558286 | 45.4850218 |
| *Celtis australis* | 3,8 | 2 | 8 | 16x14 | 14.1450864 | 44.9832211 |
| *Quercus sp.* | 3,7 | 1 | 12 | 8x9 | 13.6582643 | 45.2718296 |
| *Olea europaea* | 3,6 | 1 | 5 | 7 |  |  |
| *Quercus cerris* | 3,6 | 1 | 22 | 25x30 | 13.9814708 | 45.1189725 |
| *Cedrus libani* | 3,6 | 3 | 12 | 11x15 | 13.5925359 | 45.2690566 |
| *Prunus dulcis* | 3,5 | 4 | 12 | 14*13 | 13.8815028 | 45.0893261 |
| *Quercus ilex* | 3,4 | 2 | 20 | 16 | 13.74468 | 44.990212 |
| *Acer campestre* | 3,4 | 1 | 15 | 12x10 | 13.9908731 | 45.2511053 |
| *Quercus cerris* | 3,36 | 1 | 12 | 12,4x10 | 13.6526617 | 45.2304852 |
| *Quercus pubescens* | 3,3 | 1 | 9,5 | 14x16 | 13.6213162 | 45.1968007 |
| *Quercus pubescens* | 3,3 | 1 | 10 | 20x21 | 13.9334164 | 44.9807797 |
| *Cedrus libani* | 3,25 | 2 | 8 | 15x19 | 13.5925359 | 45.2690566 |
| *Celtis australis* | 3,1 | 2 | 27 | 12 | 13.7979928 | 44.9514569 |
| *Quercus petraea* | 3,1 | 1 | 22 | 20 | 13.5734874 | 45.3822441 |
| *Juglans regia* | 3,1 | 1 | 13 | 23x24 | 13.917801 | 44.9924306 |
| *Celtis australis* | 3 | 1 | 25 | 16 | 13.768882 | 45.0004664 |
| *Celtis australis* | 2,9 | 1 | 12 | 15x12 | 13.6201568 | 45.2451616 |
| *Celtis australis* | 2,9 | 1 | 15 | 15x15 | 13.6516327 | 45.2398863 |
| *Celtis australis* | 2,77 | 2 | 7 | 15x13 | 13.9552141 | 44.8285804 |
| *Pyrus pyraster* | 2,7 | 2 | 12 | 13x10 | 13.6578549 | 45.2713768 |
| *Prunus dulcis* | 2,62 | 1 | 9 | 15,7x14 | 13.5999069 | 45.175909 |
| *Pinus halepensis* | 2,5 | 1 | 6 | 12,5x14 | 13.5118561 | 45.4410056 |
| *Cupressus sempervirens* | 2,45 | 1 | 8,5 | 10x10 | 13.9006071 | 45.3029318 |
| *Celtis australis* | 2,4 | 1 | 7,8 | 14x12 | 13.9365529 | 44.8218785 |
| *Morus nigra* | 2,4 | 1 | 6 | 5 | 13.8330737 | 45.357719 |
| *Morus alba* | 2,35 | 1 | 4 | 12x8 | 13.6141403 | 45.1533409 |
| *Olea europaea* | 2,1 | 1 | 5 | 8x7 | 13,6484803 | 45,3510795 |
| *Morus alba* | 2 | 1 | 5 | 7x10 | 13.6141403 | 45.1533409 |
| *Acer monspessulanu-m* | 2 | 2 | 7,5 | 10x8 | 13.7556731 | 45.1334807 |
| *Morus nigra* | 2 | 1 | 4 | 5 | 13.8333113 | 45.3577479 |
